# Supplementary material for: EB1 and EB3 regulate microtubule minus end organization and Golgi morphology
Source: PubMed Central journal article supplement — J Cell Biol. 2017 Oct 2;216(10):3179–98. doi: 10.1083/jcb.201701024 (PMC5626540; doi:10.1083/jcb.201701024), 2017-10-02
Supplement: JCB_201701024_TableS1.pdf [file JCB_201701024_TableS1.pdf]

Table S1. **Mutations in EB genes from different clones**

**Hela EB1/2/3mut EB1 control**

**EB1**

gRNA: TGGAAAAGACTATGACCCTG  
AACTATGATGGAAAAGACTATGACCCTGTGGCTGCCAGACAAGGTCAAGAAACTGCAGTGGCTCCTTCCCTTGTGTGCCAGCTCTGAATAAA  
N Y D G K D Y D P V A A R Q G Q E T A V A P S L V A P A L N K

Clone #1 Insertion: C EB1 126AA +21AA after frameshift  
AACTATGATGGAAAAGACTATGACCCTGTGGCTGCCAGACAAGGTCAAGAAACTGCAGTGGCTCCTTCCCTTGTGTGCCAGCTCTGAATAAA  
N Y D G K D Y D P C G C Q T R S R N C S G S F P C C S S S E Stop

Clone #1 Deletion: C EB1 125AA +20AA after frameshift  
AACTATGATGGAAAAGACTATGACC-TGTGGCTGCCAGACAAGGTCAAGAAACTGCAGTGGCTCCTTCCCTTGTGTGCCAGCTCTGAATAAA  
N Y D G K D Y D L W L P D K V K K L Q W L L P L L L Q L Stop

Clone #2 Deletion: TAGC EB1 123AA +21AA after frameshift  
AACTATGATGGAAAAGAC----TACCTGTGGCTGCCAGACAAGGTCAAGAAACTGCAGTGGCTCCTTCCCTTGTGTGCCAGCTCTGAATAAA  
N Y D G K D Y L W L P D K V K K L Q W L L P L L L Q L Stop

Clone #2 Deletion: C EB1 125AA +20AA after frameshift  
AACTATGATGGAAAAGACTATGACC-TGTGGCTGCCAGACAAGGTCAAGAAACTGCAGTGGCTCCTTCCCTTGTGTGCCAGCTCTGAATAAA  
N Y D G K D Y D L W L P D K V K K L Q W L L P L L L Q L Stop

**EB2**

gRNA: CCGGAAGCACACAGTGC GCG  
ATTCCTTCCGGAAGCACACAGTGC GCGGGGAGCGTTCCTACAG(intron)  
I P F R K H T V R G E R S Y

Clone #1 Deletion: GCGGGAGCG EB2 34AA +15AA after frameshift  
ATTCCTTCCGGAAGCACACAGTGC-----TTCCTACAG(intron)  
I P F R K H T V L P T

Clone #1 Deletion: CACACAGTGC GCGGGGAGCGTTCCTACAG EB2 31AA +20AA after frameshift  
ATTCCTTCCGGAAG----- (intron)  
I P F R K

Clone #2 Insertion: C EB2 34AA +293 AA after frameshift  
ATTCCTTCCGGAAGCACACAGTGC CCGGGGAGCGTTCCTACAG(intron)  
I P F R K H T V P R G A F L Q

Clone #2 Deletion: CAGTGC GCGGGGAGCGTTCCTA EB2 32AA +13AA after frameshift  
ATTCCTTCCGGAAGCACA-----CAG(intron)  
I P F R K H T

**EB3**

gRNA: TGCACCTCAACTATAACCAAG  
TGGGTCAACGACTCCCTGCACCTCAACTATAACCAAGATAGAACAGCTTTGTTTCAG(intron)  
W V N D S L H L N Y T K I E Q L C S

Clone #1 Deletion: GACTCCCTGCACCTCAAC EB3 Deletion of 6AA in CH domain  
TGGGTCAAC-----TATAACCAAGATAGAACAGCTTTGTTTCAG(intron)  
W V N Y T K I E Q L C S

Clone #2 Insertion: A EB3 28AA +59AA after frameshift  
TGGGTCAACGACTCCCTGCAACCTCAACTATAACCAAGATAGAACAGCTTTGTTTCAG(intron)  
W V N D S L Q P Q L Y Q D R T A L F

**RPE EB1/3mut**

**EB1**

gRNA: TGGAAAAGACTATGACCCTG  
AACTATGATGGAAAAGACTATGACCCTGTGGCTGCCAGACAAGGTCAAGAAACTGCAGTGGCTCCTTCCTTGTGCTCCAGCTCTGAATAAA  
N Y D G K D Y D P V A A R Q G Q E T A V A P S L V A P A L N K  
Deletion: C EB1 125AA +20AA after frameshift  
AACTATGATGGAAAAGACTATGACC-TGTGGCTGCCAGACAAGGTCAAGAAACTGCAGTGGCTCCTTCCTTGTGCTCCAGCTCTGAATAAA  
N Y D G K D Y D L W L P D K V K K L Q W L L P L L L Q L Stop

**EB2**

gRNA: CCGGAAGCACACAGTGCGCG  
ATTCCTTTCCGGAAGCACACAGTGCGCGGGGAGCGTTCCTACAG(intron)  
I P F R K H T V R G E R S Y  
Insertion: A EB2 34AA +27AA after frameshift  
ATTCCTTTCCGGAAGCACACAGTGCAGCGGGGAGCGTTCCTACAG(intron)  
I P F R K H T V Q R G A F L Q  
Insertion: C EB2 34AA +27AA after frameshift  
ATTCCTTTCCGGAAGCACACAGTGCAGCGGGGAGCGTTCCTACAG(intron)  
I P F R K H T V P R G A F L Q

**EB3**

gRNA: TGCACCTCAACTATAACCAAG  
TGGGTCAACGACTCCCTGACCTCAACTATAACCAAGATAGAACAGCTTTGTTCAG(intron)  
W V N D S L H L N Y T K I E Q L C S  
Insertion: A EB3 28AA +59AA after frameshift  
TGGGTCAACGACTCCCTGCAACCTCAACTATAACCAAGATAGAACAGCTTTGTTCAG(intron)  
W V N D S L Q P Q L Y Q D R T A L F

For each gene, the gRNA target sequence, the WT sequence, and its translation are shown in black, deletions are indicated by dashes, and insertions and amino acids resulting from frameshifts are shown in red. Parentheses indicate start of an intron. Note that in HeLa1/2/3mut clone 1, a small in-frame deletion is present in the EB3 CH domain, but no EB3 reactivity is detected in this clone with anti-EB3 rabbit polyclonal antibodies. All the different allelic variants of EB-encoding genes recovered from each clone are shown.
